# Supplementary material
Source: publisher figshare collection journal article supplement (https://acs.figshare.com/ndownloader/files/4764601)

## 2-Aminopyrrolidines: New Chiral Amidinate Ligands with a Rigid, Well Defined Molecular Structure and their Coordination to $\text{Ti}^{\text{IV}}$

### Supplementary Material

#### Analysis of the exchange between the isomers of the bis(amidinato)titanium complexes

Eyring plots for three independent measurements for **11** are provided below:

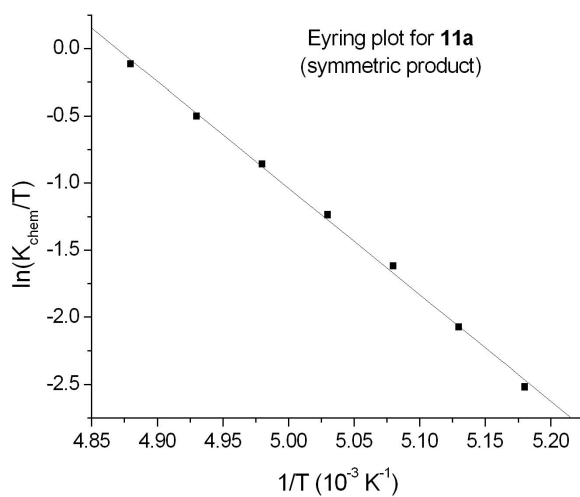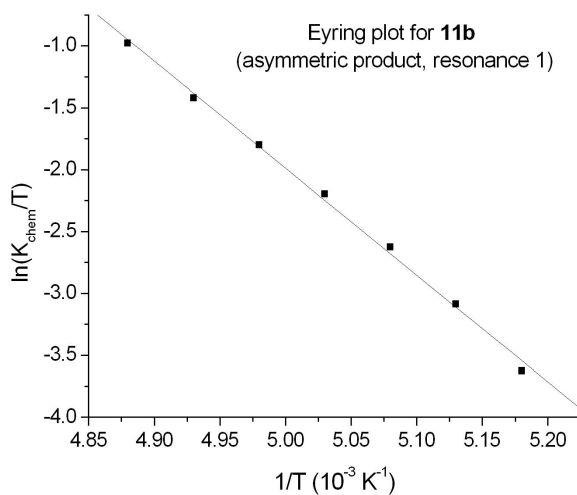

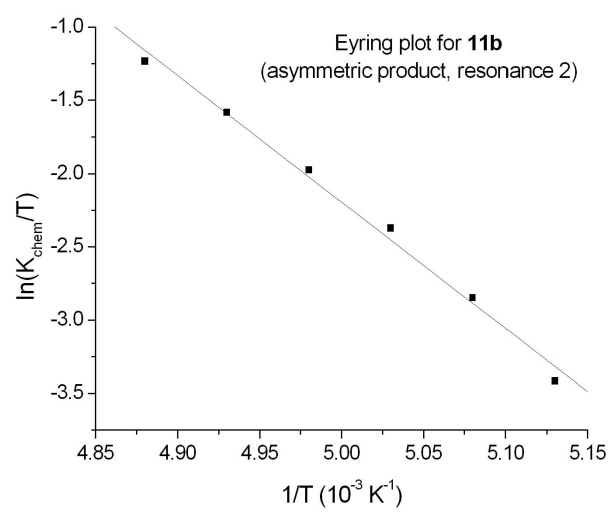

Supplement: Supplementary file 1 [file 4764601]
